# Supplementary figures and images for: seqlm: an MDL based method for identifying differentially methylated regions in high density methylation array data
Source: PubMed Central journal article supplement — Bioinformatics. 2016 May 13;32(17):2604–10. doi: 10.1093/bioinformatics/btw304 (PMC5013909; doi:10.1093/bioinformatics/btw304), 2016-05-13

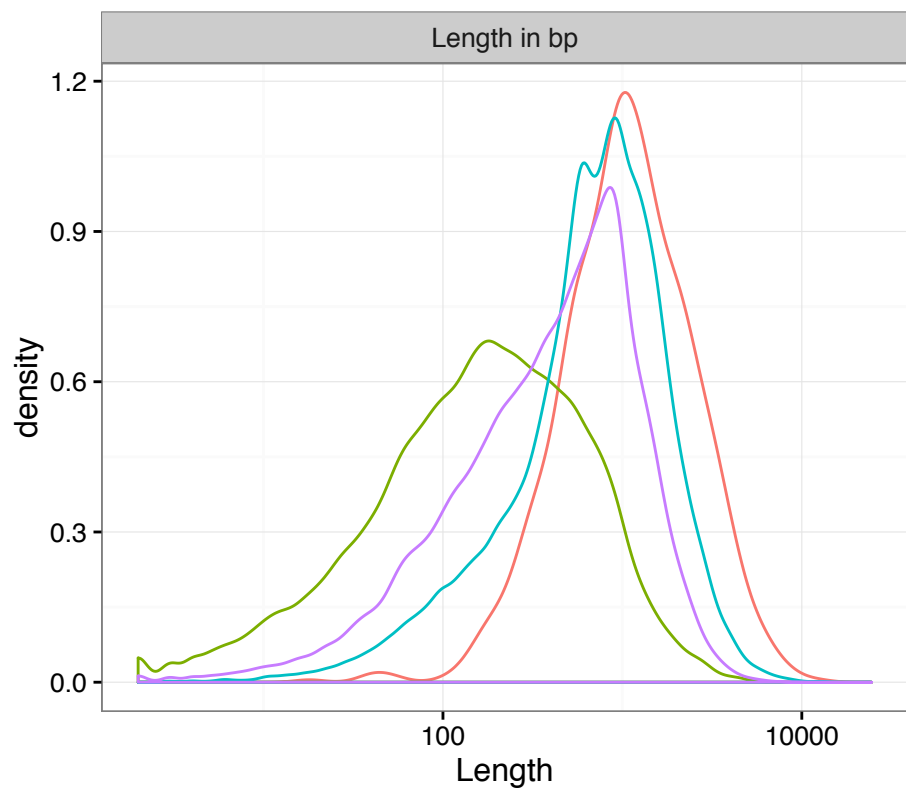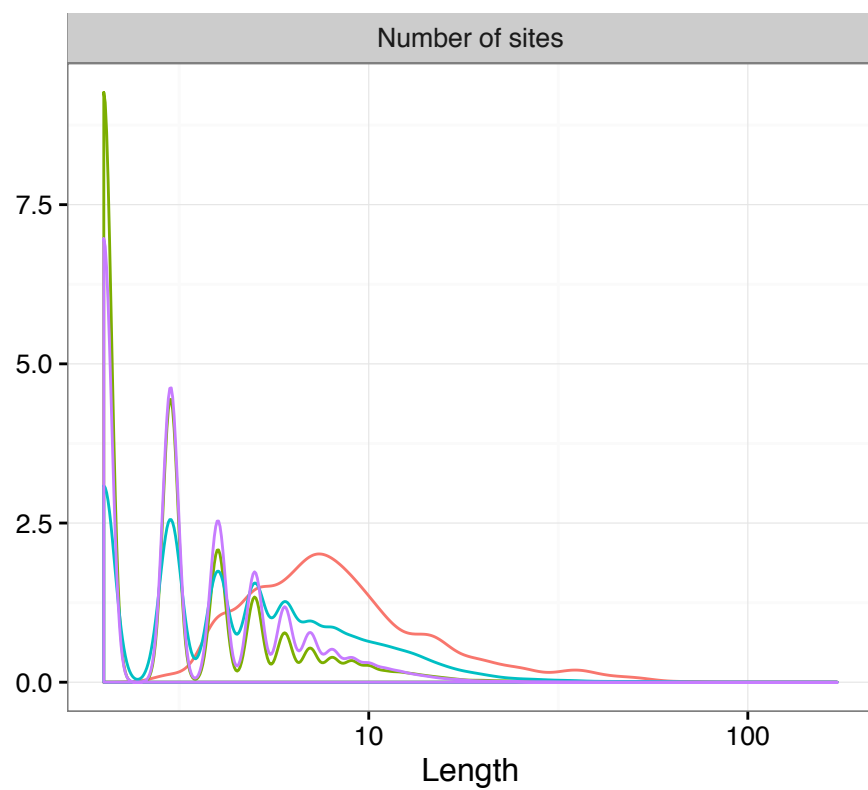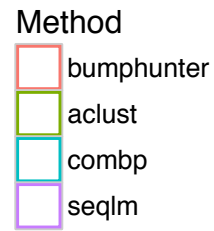

Supplement: supp_btw304_SupplementaryS1.pdf [file supp_btw304_SupplementaryS1.pdf]
